# Supplementary material for: MicroRNA Processing Pathway-Based Polygenic Score for Clear Cell Renal Cell Carcinoma in the Volga-Ural Region Populations of Eurasian Continent
Source: MDPI journal article supplement (doi:10.3390/genes13071281), 2022-07-20
Supplement: s1 [file s1]

Table S1. PheWAS data of studied SNPs in microRNA biogenesis pathway genes

| Feature                                                     | Chr | RSID       | Gene            | Allele | Position  | Phenotype                                                                   | $\beta$ | SE( $\beta$ ) | p-value               |
|-------------------------------------------------------------|-----|------------|-----------------|--------|-----------|-----------------------------------------------------------------------------|---------|---------------|-----------------------|
| Urological cancers                                          | 1   | rs595055   | AGO1            | T      | 36380133  | Malignant neoplasm of bladder                                               | -0.13   | 0.05          | 6.35x10 <sup>-3</sup> |
|                                                             |     |            |                 |        |           | Cancer of bladder                                                           | -0.11   | 0.04          | 9.50x10 <sup>-3</sup> |
|                                                             | 17  | rs2740348  | GEMIN4          | G      | 649935    | Cancer of bladder                                                           | 0.07    | 0.04          | 0.06                  |
|                                                             | 17  | rs2740351  | FAM57A (GEMIN4) | G      | 643426    | Malignant neoplasm of other urinary organs                                  | 0.25    | 0.12          | 0.04                  |
|                                                             | 17  | rs7813     | GEMIN4          | G      | 648186    | Malignant neoplasm of other urinary organs                                  | 0.26    | 0.13          | 0.04                  |
| Other malignant neoplasms with the most significant p-value | 1   | rs197412   | DDX20           | C      | 112308953 | Cancer of brain and nervous system                                          | 0.18    | 0.06          | 3.96x10 <sup>-3</sup> |
|                                                             |     |            |                 |        |           | Benign neoplasm of other female genital organs Secondary malignant neoplasm | 0.27    | 0.10          | 6.60x10 <sup>-3</sup> |
|                                                             |     |            |                 |        |           | Secondary malignant neoplasm                                                | -0.04   | 0.01          | 9.37x10 <sup>-3</sup> |
|                                                             | 1   | rs11584657 | FAM212B         | T      | 112296374 | Secondary malignant neoplasm                                                | -0.06   | 0.02          | 6.30x10 <sup>-3</sup> |
|                                                             | 5   | rs4867329  | DROSHA          | C      | 31435627  | Bone cancer                                                                 | 0.39    | 0.13          | 2.34x10 <sup>-3</sup> |
|                                                             |     |            |                 |        |           | Multiple myeloma                                                            | 0.18    | 0.06          | 3.43x10 <sup>-3</sup> |
|                                                             |     |            |                 |        |           | Benign neoplasm of other endocrine glands and related structures            | -0.13   | 0.05          | 6.56x10 <sup>-3</sup> |
|                                                             | 6   | rs2257082  | XPO5            | A      | 43492578  | Malignant neoplasms of ovary                                                | 0.12    | 0.04          | 3.82x10 <sup>-4</sup> |
|                                                             |     |            |                 |        |           | Malignant neoplasm of ovary and other uterine adnexa                        | 0.12    | 0.04          | 4.66x10 <sup>-4</sup> |
|                                                             |     |            |                 |        |           | Cervical cancer                                                             | 0.12    | 0.04          | 2.54x10 <sup>-3</sup> |
|                                                             |     |            |                 |        |           | Cervical cancer and dysplasia                                               | 0.08    | 0.03          | 4.14x10 <sup>-3</sup> |
|                                                             |     |            |                 |        |           | Cancer of other female genital organs                                       | 0.09    | 0.03          | 7.32x10 <sup>-3</sup> |
|                                                             | 8   | rs3864659  | AGO2            | C      | 141555862 | Cancer of other endocrine glands                                            | -0.61   | 0.23          | 8.82x10 <sup>-3</sup> |
|                                                             | 22  | rs417309   | DGCR8           | A      | 20098544  | Malignant neoplasm of rectum, rectosigmoid junction, and anus               | 0.18    | 0.05          | 1.01x10 <sup>-3</sup> |
|                                                             |     |            |                 |        |           | Second malignancy of brain/spine                                            | 0.23    | 0.09          | 7.57x10 <sup>-3</sup> |
