# Supplementary material for: MicroRNA Processing Pathway-Based Polygenic Score for Clear Cell Renal Cell Carcinoma in the Volga-Ural Region Populations of Eurasian Continent
Source: MDPI journal article supplement (doi:10.3390/genes13071281), 2022-07-20
Supplement: s1 [file s1]

**Table S2.** Association between 28 DNA variants in miRNA biogenesis genes and ccRCC in Volga-Ural populations.

| Gene name                     | Chromosome | Position, (GRCh37) | rsID       | Risk Allele/ Non-risk allele | Effect allele frequency cases/controls | OR (95%CI)              | P-value                      |
|-------------------------------|------------|--------------------|------------|------------------------------|----------------------------------------|-------------------------|------------------------------|
| <i>AGO1</i>                   | 1          | 36,380,133         | rs595055   | T/C                          | 0.26/0.30                              | <b>1.20 (0.71-0.99)</b> | <b>0.04</b>                  |
| <i>FAM212B</i>                | 1          | 112,296,374        | rs11584657 | C/T                          | 0.20/0.20                              | 1.02 (0.80-1.19)        | 0.82                         |
| <i>DDX20</i>                  | 1          | 112,308,953        | rs197412   | T/C                          | 0.47/0.49                              | 1.11 (0.77-1.06)        | 0.21                         |
| <i>DROSHA</i>                 | 5          | 31,401,003         | rs642321   | T/C                          | 0.26/0.25                              | 1.05 (0.88-1.26)        | 0.57                         |
| <i>DROSHA</i>                 | 5          | 31,401,447         | rs10719    | A/G                          | 0.31/0.30                              | 1.06 (0.90-1.25)        | 0.51                         |
| <i>DROSHA</i>                 | 5          | 31,435,627         | rs4867329  | A/C                          | 0.46/0.49                              | 1.11 (0.77-1.05)        | 0.19                         |
| <i>C5orf22</i>                | 5          | 31,532,789         | rs17409893 | A/G                          | 0.31/0.32                              | 1.08 (0.78-1.10)        | 0.37                         |
| <i>XPO5</i>                   | 6          | 43,492,578         | rs2257082  | G/A                          | 0.33/0.33                              | 1.00 (0.84-1.18)        | 0.98                         |
| <i>AGO2</i>                   | 8          | 141,555,862        | rs3864659  | A/C                          | 0.12/0.14                              | 1.15 (0.69-1.10)        | 0.24                         |
| <i>AGO2</i>                   | 8          | 141,594,460        | rs7005286  | T/C                          | 0.23/0.21                              | 1.11 (0.93-1.33)        | 0.26                         |
| <i>MIR196A2</i>               | 12         | 54,385,599         | rs11614913 | T/C                          | 0.38/0.37                              | 1.06 (0.91-1.25)        | 0.45                         |
| <i>PIWIL1</i>                 | 12         | 130,852,174        | rs11060845 | G/T                          | 0.07/0.11                              | <b>1.69 (0.44-0.79)</b> | <b>4.32×10<sup>-4</sup></b>  |
| <i>PIWIL1</i>                 | 12         | 130,856,316        | rs10773771 | T/C                          | 0.40/0.43                              | 1.14 (0.74-1.03)        | 0.11                         |
| <i>RAN</i>                    | 12         | 131,355,546        | rs3809142  | C/T                          | 0.11/0.16                              | <b>1.57 (0.50-0.81)</b> | <b>3.05×10<sup>-4</sup></b>  |
| <i>DICER1</i>                 | 14         | 95,554,142         | rs1057035  | C/T                          | 0.44/0.29                              | <b>1.85 (1.58-2.18)</b> | <b>4.05×10<sup>-14</sup></b> |
| <i>DICER1</i>                 | 14         | 95,556,747         | rs13078    | T/A                          | 0.13/0.17                              | <b>1.28 (0.62-0.98)</b> | <b>0.03</b>                  |
| <i>FAM57A (GEMIN4)</i>        | 17         | 643,426            | rs2740351  | G/A                          | 0.41/0.40                              | 1.06 (0.91-1.24)        | 0.47                         |
| <i>GEMIN4</i>                 | 17         | 648,186            | rs7813     | G/A                          | 0.41/0.39                              | 1.04 (0.89-1.22)        | 0.59                         |
| <i>GEMIN4</i>                 | 17         | 649,232            | rs3744741  | C/T                          | 0.15/0.18                              | 1.19 (0.68-1.04)        | 0.11                         |
| <i>GEMIN4</i>                 | 17         | 649,505            | rs4968104  | T/A                          | 0.21/0.22                              | 1.06 (0.78-1.14)        | 0.55                         |
| <i>GEMIN4</i>                 | 17         | 649,935            | rs2740348  | G/C                          | 0.19/0.17                              | 1.20 (0.98-1.47)        | 0.07                         |
| microRNA-423 ( <i>NSRP1</i> ) | 17         | 28,444,183         | rs6505162  | A/C                          | 0.50/0.46                              | <b>1.17 (1.00-1.37)</b> | <b>0.04</b>                  |
| <i>DDX5</i>                   | 17         | 62,502,435         | rs1991401  | G/A                          | 0.44/0.38                              | <b>1.25 (1.07-1.47)</b> | <b>4.99×10<sup>-3</sup></b>  |
| <i>MIR27A</i>                 | 19         | 13,947,292         | rs895819   | T/C                          | 0.34/0.35                              | 1.06 (0.80-1.11)        | 0.45                         |
| <i>DGCR8*</i>                 | 22         | 20,098,359         | rs1640299  | G/T                          | 0.39/0.38                              | 1.06 (0.90-1.25)        | 0.51                         |
| <i>DGCR8*</i>                 | 22         | 20,098,544         | rs417309   | G/A                          | 0.08/0.10                              | 1.17 (0.65-1.12)        | 0.26                         |
| <i>DGCR8*</i>                 | 22         | 20,098,582         | rs720012   | A/G                          | 0.24/0.20                              | <b>1.24 (1.03-1.49)</b> | <b>0.02</b>                  |
| <i>DGCR8*</i>                 | 22         | 20,098,882         | rs720014   | C/T                          | 0.24/0.21                              | 1.15 (0.95-1.40)        | 0.14                         |

Weighted PRS analysis demonstrated  $OR(95\%CI)=1.60(1.42-1.80)$  of the ccRCC risk with a statistical significance  $P\text{-value}=4.20\times10^{-15}$ . The microRNA biogenesis pathway weighted PRS predicted the risk of developing ccRCC with  $AUC=0.637$  ( $95\%CI[0.61-0.67]$ ), sensitivity of 0.58 and a specificity of 0.66 (Figure S2).

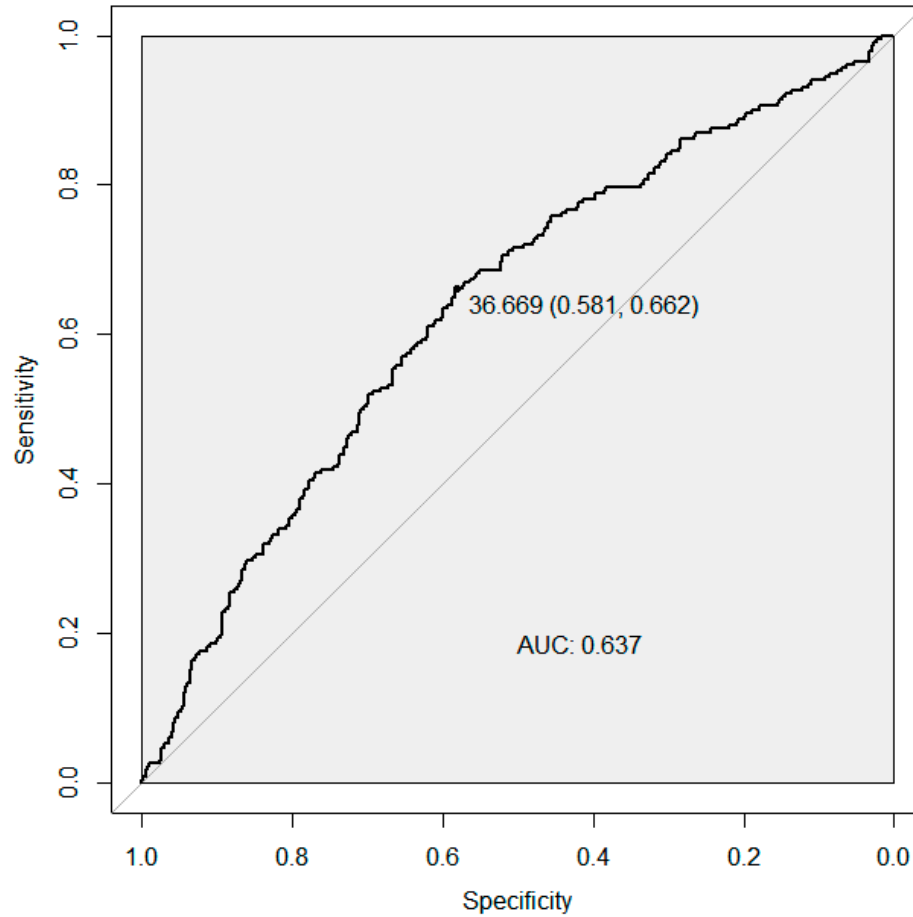

**Figure S2.** ROC curves assessing the discriminative power of the weighted PRS model for the ccRCC risk. The best predictive point is shown with the ideal cut-off for the PRS and with estimates for specificity and sensitivity at that point. AUC, area under the curve.

Unweighted PRS analysis demonstrated  $OR(95\%CI)=1.50(1.34-1.69)$  of the ccRCC risk with a statistical significance  $P\text{-value}=4.15\times10^{-12}$ . The microRNA biogenesis pathway unweighted PRS predicted the risk of developing ccRCC with  $AUC=0.622$  ( $95\%CI[0.59-0.65]$ ), sensitivity of 0.55 and a specificity of 0.69 (Figure S3).

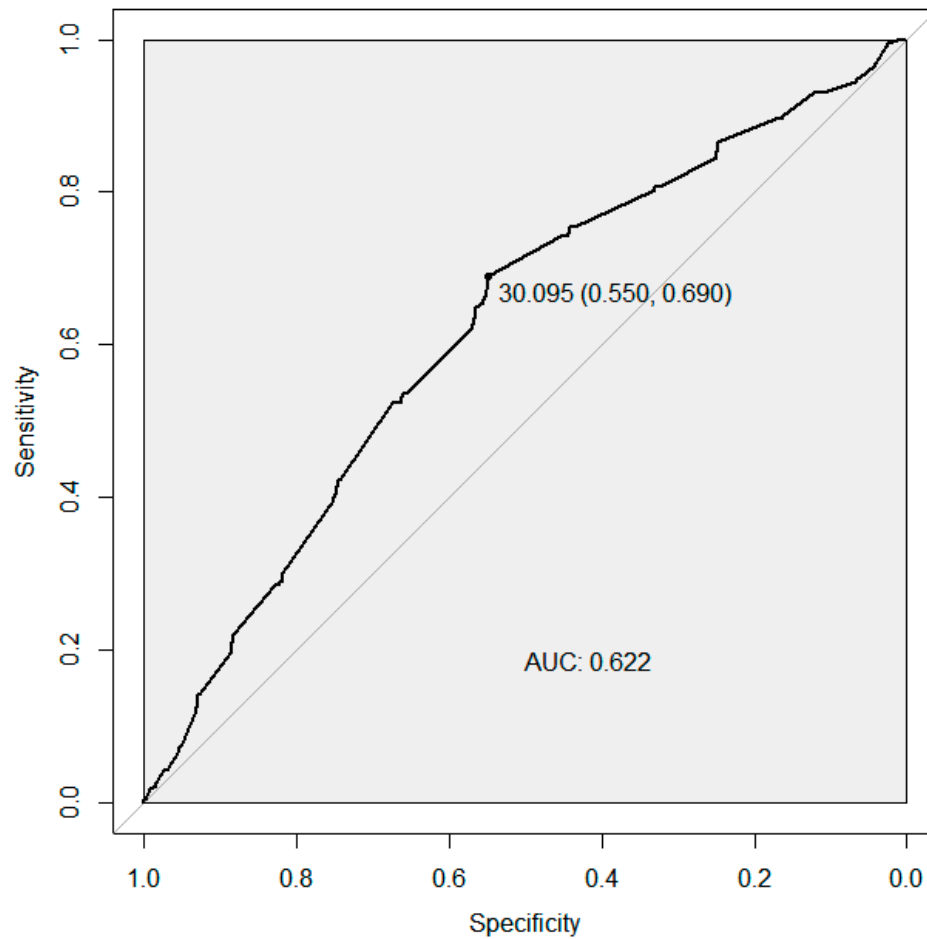

**Figure S3.** ROC curves assessing the discriminative power of the unweighted PRS model for the ccRCC risk. The best predictive point is shown with the ideal cut-off for the PRS and with estimates for specificity and sensitivity at that point. AUC, area under the curve.
