# Supplementary material for: MicroRNA Processing Pathway-Based Polygenic Score for Clear Cell Renal Cell Carcinoma in the Volga-Ural Region Populations of Eurasian Continent
Source: MDPI journal article supplement (doi:10.3390/genes13071281), 2022-07-20
Supplement: s1 [file s1]

Table S3. Linkage disequilibrium using the European+Asian populations LD estimates from the 1000 Genomes Project ([www.ldlink.nci.nih.gov](http://www.ldlink.nci.nih.gov)) between SNPs located within 500kb from each other

| SNP pair              | r <sup>2</sup> |
|-----------------------|----------------|
| rs11584657-rs197412   | 0.309          |
| rs642321-rs10719      | 0.649          |
| rs4867329-rs10719     | 0.338          |
| rs4867329-rs17409893  | 0.029          |
| rs3864659-rs7005286   | 0.007          |
| rs11060845-rs10773771 | 0.114          |
| rs1057035-rs13078     | 0.007          |
| rs2740351-rs7813      | 0.974          |
| rs2740351- rs3744741  | 0.171          |
| rs2740351- rs4968104  | 0.452          |
| rs2740351-rs2740348   | 0.264          |
| rs7813-rs3744741      | 0.173          |
| rs7813- rs4968104     | 0.455          |
| rs7813- rs2740348     | 0.264          |
| rs3744741-rs4968104   | 0.079          |
| rs3744741-rs2740348   | 0.046          |
| rs4968104-rs2740348   | 0.036          |
| rs1640299-rs417309    | 0.041          |
| rs1640299-rs720012    | 0.262          |
| rs1640299-rs720014    | 0.364          |
| rs417309-rs720012     | 0.026          |
| rs417309-rs720014     | 0.015          |
| rs720012-rs720014     | 0.095          |
