# Supplementary material for: MicroRNA Processing Pathway-Based Polygenic Score for Clear Cell Renal Cell Carcinoma in the Volga-Ural Region Populations of Eurasian Continent
Source: Genes (Basel). 2022 Jul 20;13(7):1281. doi: 10.3390/genes13071281 (PMC9324265; doi:10.3390/genes13071281)
Supplement: Supplementary file 1 [file genes-13-01281-s001.zip]

Archive with 4 entries (4 files):
- Supplementary File_1.pdf
- Supplementary File_2.pdf
- Supplementary File_3.pdf
- Supplementary Materials_File 4.pdf
